# Supplementary material for: Targeting CD70 in cutaneous T-cell lymphoma using an antibody-drug conjugate in patient-derived xenograft models
Source: PubMed Central journal article supplement — Blood Adv. 2022 Apr 5;6(7):2290–302. doi: 10.1182/bloodadvances.2021005714 (PMC9006301; doi:10.1182/bloodadvances.2021005714), 2022-04-05
Supplement: advancesADV2021005714-suppl1.pdf [file advancesADV2021005714-suppl1.pdf]

**Figure S1**

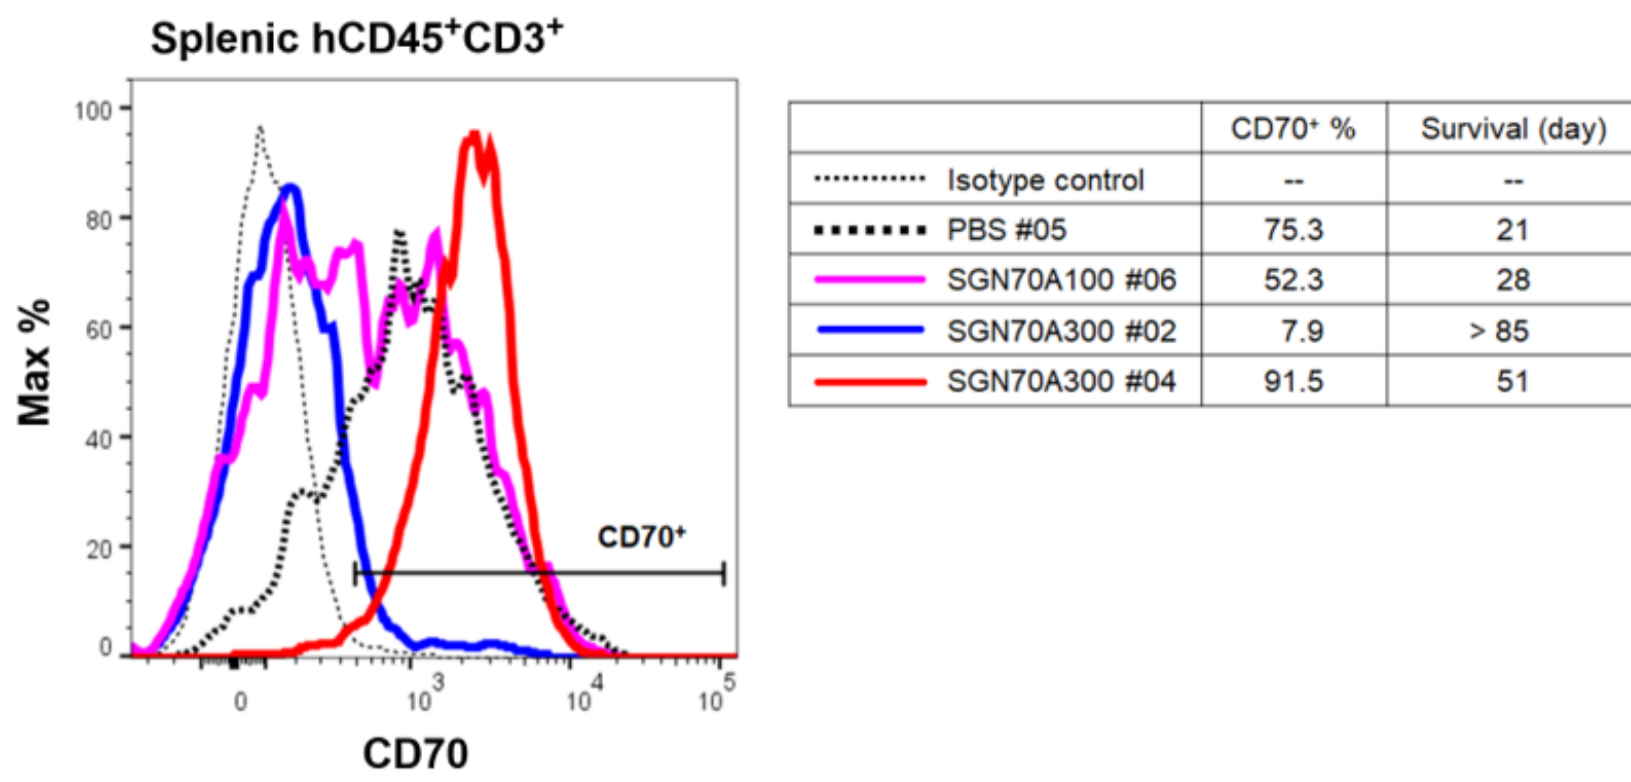

**Figure S1. Expression levels of CD70 in primary tumor cells from PDX mice.** The frequency of CD70 expression in primary tumor cell (hCD45<sup>+</sup>CD3<sup>+</sup> T cell) from PBS or SGN-CD70A treated PDX mice and the corresponding survivals.

Figure S2

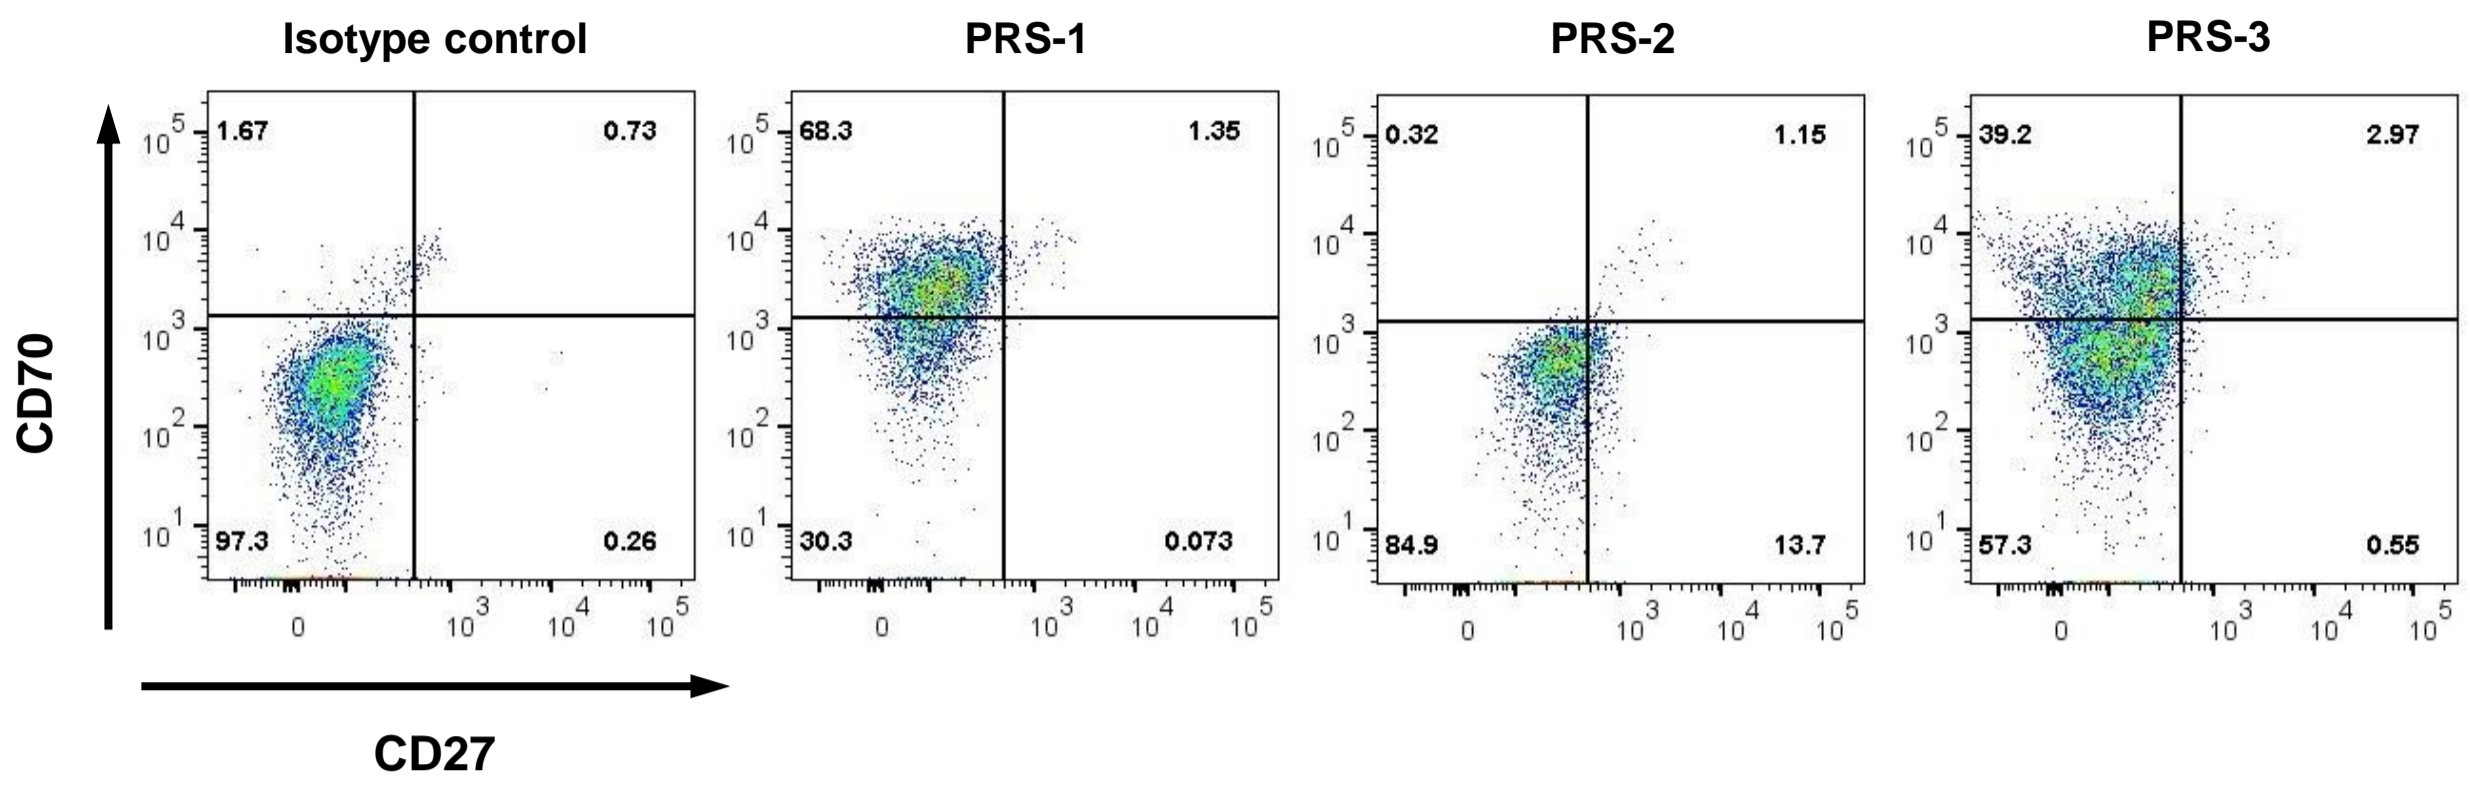

Figure S2. CD70 and CD27 expression in primary tumor cells from PDXs. The populations of the CD70 and CD27-expressing cell (in CD3<sup>+</sup>CD4<sup>+</sup> T cell) from spleen of three PDXs.
